# Supplementary material for: iTRAQ-Based Quantitative Proteomics Reveals the Energy Metabolism Alterations Induced by Chlorogenic Acid in HepG2 Cells
Source: MDPI journal article supplement (doi:10.3390/nu14081676), 2022-04-18
Supplement: s1 [file s1]

Supplementary Figure and Figure legend

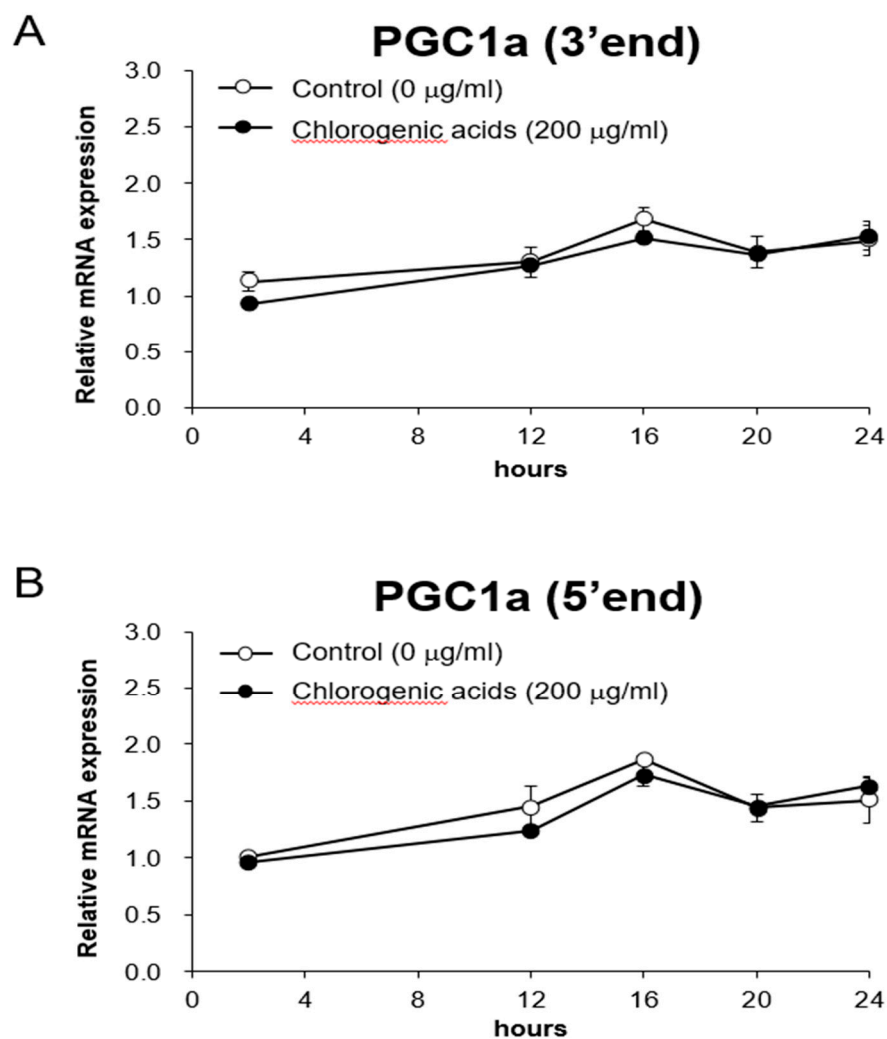

**Figure S1.** The effects of chlorogenic acid on the mRNA expression of PGC1a gene. HepG2 cells were cultured in DMEM medium containing chlorogenic acid (200 µg/ml), and the mRNA expression at each time point was measured by RT-PCR. **A:** Using the primer designed near the 3' end. **B:** Using the primer designed near the 5' end. The data are shown as mean  $\pm$  SE ( $n = 4$ ).
